# Supplementary material for: Pretargeted Alpha Therapy of Disseminated Cancer Combining Click Chemistry and Astatine-211
Source: MDPI journal article supplement (doi:10.3390/ph16040595), 2023-04-15
Supplement: s1 [file s1]

## Supplementary material

# Pretargeted Alpha Therapy of Disseminated Cancer combining Click Chemistry and Astatine-211

Chiara Timperanza<sup>1\*</sup>, Holger Jensen<sup>2</sup>, Tom Bäck<sup>1</sup>, Sture Lindegren<sup>1</sup>, Emma Aneheim<sup>1,3</sup>

<sup>1</sup> Department of Medical Radiation Sciences, Institute of Clinical Sciences, Sahlgrenska Academy, University of Gothenburg, 413 45 Gothenburg, Sweden;

<sup>2</sup> PET and Cyclotron Unit, KF-3982, Copenhagen university hospital, DK2100 Copenhagen, Denmark;

<sup>3</sup>Department of Oncology, Sahlgrenska University Hospital, Region Västra Götaland, 413 45 Gothenburg, Sweden;

\* Correspondence: chiara.timperanza@gu.se

**Table S1:** Blood activity profiles reported as the percentage of injected activity per gram (%IA/g) over time in healthy female Balb C mice of two sizes of iodinated effector molecule: 21 kDa (average from n = 2; A and B) and 10 kDa (n = 1; C) poly-L-lysine.

| Time (h) | %IA/g  |     |        |
|----------|--------|-----|--------|
|          | 21 kDa |     | 10 kDa |
|          | A      | B   | C      |
| 0,4      | 3,4    | 3,6 | 3,4    |
| 0,8      | 3,0    | 2,2 | 2,5    |
| 1,9      | 1,3    | 1,7 | 0,8    |
| 3,9      | 0,7    | 0,5 | 0,5    |
| 20,5     | 0,1    | 0,1 | 0,1    |

**Table S2:** Biodistribution of two sizes of iodinated effector molecule, 21 kDa and 10 kDa poly-L-lysine, reported as the percentage of injected activity per gram (%IA/g) over time in four healthy female Balb C mice (two mice for each group). One of the animals injected with the 10 kDa effector molecule received an extravascular injection and was therefore excluded from the study.

| Organ                  | %IA/g after 24 h |        |
|------------------------|------------------|--------|
|                        | 21 kDa           | 10 kDa |
| Blood                  | 0,02 ± 0,01      | 0,04   |
| Heart                  | 1,18 ± 0,04      | 0,06   |
| Lungs                  | 1,50 ± 1,02      | 0,13   |
| Salivary glands        | 0,06 ± 0,01      | 0,02   |
| Throat (incl. Thyroid) | 0,49 ± 0,09      | 1,13   |
| Liver                  | 17,35 ± 0,88     | 5,82   |
| Spleen                 | 4,06 ± 0,25      | 1,41   |
| Kidneys                | 0,39 ± 0,04      | 0,21   |
| Stomach                | 0,16 ± 0,04      | 0,02   |
| Small intestine        | 0,09 ± 0,09      | 0,03   |
| Large intestine        | 0,11 ± 0,04      | 0,08   |
| i.p. fat               | 0,15 ± 0,10      | 0,05   |
| Muscle                 | 0,56 ± 0,35      | 0,02   |
| Femur                  | 1,20 ± 0,20      | 0,51   |
